# Supplementary material for: A shared genetic signature for common chronic pain conditions and its impact on biopsychosocial traits
Source: bioRxiv or medRxiv preprint supplement (doi:10.1101/2022.03.13.22272317), 2022-06-10
Supplement: Supplementary file [file media-2.pdf]

**Supplementary Figures:** Farrell et al. — ‘A shared genetic signature for common chronic pain conditions and its impact on biopsychosocial traits’

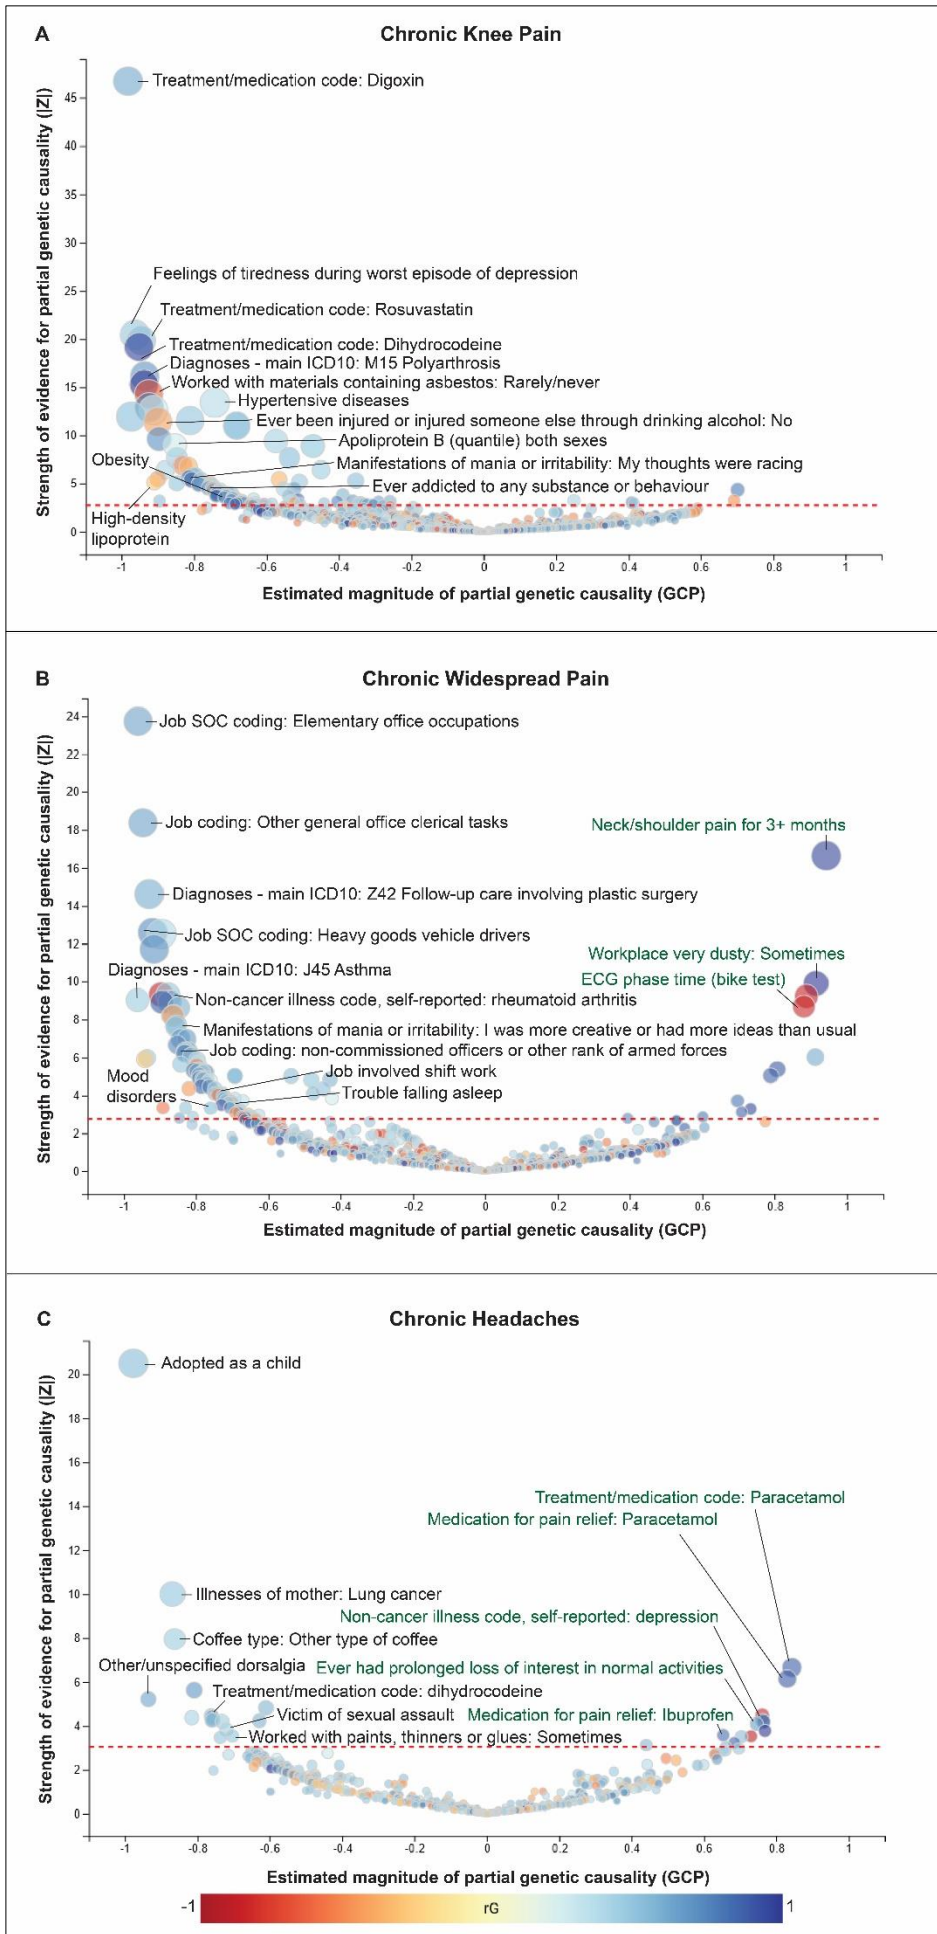

**Supplementary Figures:** Farrell et al. — ‘A shared genetic signature for common chronic pain conditions and its impact on biopsychosocial traits’

**Supplementary Figure S1:** Causal architecture plots presenting the relationships of various traits with (A) chronic knee pain, (B) widespread pain and (C) headaches. Each dot is a data point representing a genetic correlation ( $r_G$ ). The colour of a dot indicates whether the genetic correlation is positive (red) or negative (blue). The x-axis denotes the genetic causal proportion (GCP) estimate and the y-axis denotes the GCP absolute Z-score (i.e., statistical significance). The red dashed line shows the threshold for statistical significance (5% false discovery rate). Traits that have a genetic causal effect on chronic pain are on the left side of the plot (with respect to 0 on the x-axis; GCP < -0.6, black text), while traits causally affected by chronic pain are on the right side (GCP > 0.6, green text). Selected traits are labelled for illustrative purposes — spanning clinical, biological, psychological and socioeconomic measures. Full details of all significant genetic causal relationships are provided in Supplementary Tables S5, S8 & S9.

**Supplementary Figures:** Farrell et al. — ‘A shared genetic signature for common chronic pain conditions and its impact on biopsychosocial traits’

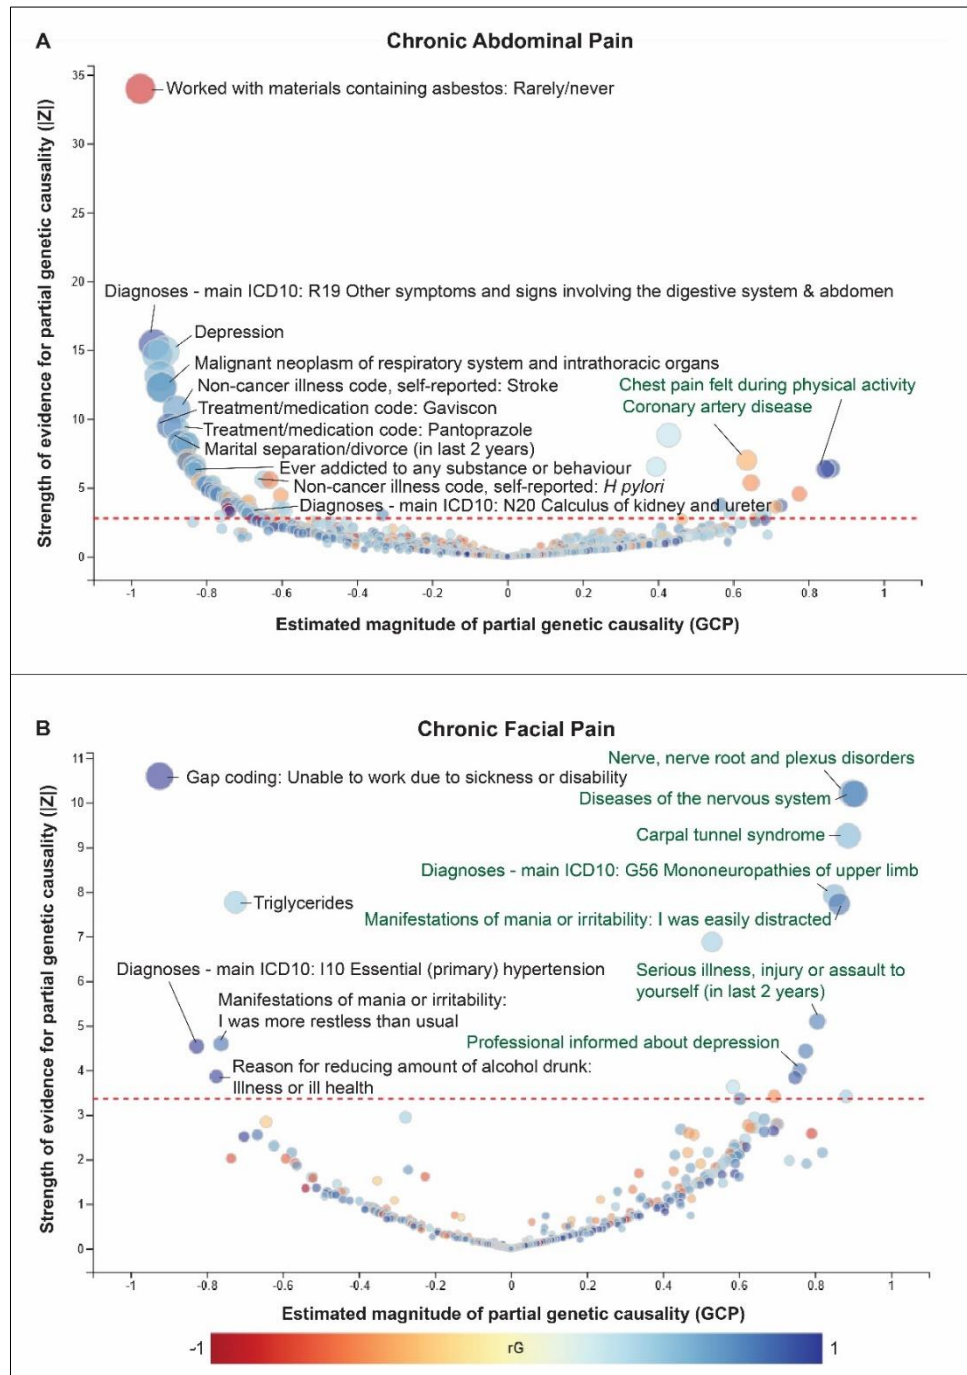

**Supplementary Figure S2:** Causal architecture plots presenting the relationships of various traits with (A) chronic abdominal pain and (B) facial pain. Each dot is a data point representing a genetic correlation ( $rG$ ). The colour of a dot indicates whether the genetic correlation is positive (red) or negative (blue). The x-axis denotes the genetic causal proportion (GCP) estimate and the y-axis denotes the GCP absolute Z-score (i.e., statistical significance). The red dashed line shows the threshold for statistical significance (5% false discovery rate). Traits that have a genetic causal effect on chronic pain are on the left side of the plot (with respect to 0 on the x-axis;  $GCP < -0.6$ , black text), while traits causally affected by chronic pain are on the right side ( $GCP > 0.6$ , green text). Selected traits are labelled for illustrative purposes. Full details of all significant genetic causal relationships are provided in Supplementary Tables S6 & S7.
