# Supplementary material for: A shared genetic signature for common chronic pain conditions and its impact on biopsychosocial traits
Source: bioRxiv or medRxiv preprint supplement (doi:10.1101/2022.03.13.22272317), 2022-06-10
Supplement: Supplementary file [file media-4.pdf]

**TABLE 1. STREGA reporting recommendations, extended from STROBE Statement**

| Item                        | Item number | STROBE Guideline                                                                                     | Extension for Genetic Association Studies (STREGA)                                                                                                           |
|-----------------------------|-------------|------------------------------------------------------------------------------------------------------|--------------------------------------------------------------------------------------------------------------------------------------------------------------|
| <b>Title and Abstract</b>   | 1           | (a) Indicate the study's design with a commonly used term in the title or the abstract.              | P4, Abstract                                                                                                                                                 |
|                             |             | (b) Provide in the abstract an informative and balanced summary of what was done and what was found. | P4                                                                                                                                                           |
| <b>Introduction</b>         |             |                                                                                                      |                                                                                                                                                              |
| <i>Background rationale</i> | 2           | Explain the scientific background and rationale for the investigation being reported.                | P5-6, Introduction                                                                                                                                           |
| <i>Objectives</i>           | 3           | State specific objectives, including any pre-specified hypotheses.                                   | <p><b><i>State if the study is the first report of a genetic association, a replication effort, or both.</i></b></p> <p>P6, Introduction final paragraph</p> |
| <b>Methods</b>              |             |                                                                                                      |                                                                                                                                                              |
| <i>Study design</i>         | 4           | Present key elements of study design early in the paper.                                             | P6, Methods, Figure 1                                                                                                                                        |

| Item                | Item number | STROBE Guideline                                                                                                                                                                                                                                                                                                                                                                                                                                                                                                                                                                                                                                                                                                                        | Extension for Genetic Association Studies (STREGA)                                                                                                                                                                              |
|---------------------|-------------|-----------------------------------------------------------------------------------------------------------------------------------------------------------------------------------------------------------------------------------------------------------------------------------------------------------------------------------------------------------------------------------------------------------------------------------------------------------------------------------------------------------------------------------------------------------------------------------------------------------------------------------------------------------------------------------------------------------------------------------------|---------------------------------------------------------------------------------------------------------------------------------------------------------------------------------------------------------------------------------|
| <i>Setting</i>      | 5           | Describe the setting, locations and relevant dates, including periods of recruitment, exposure, follow-up, and data collection.                                                                                                                                                                                                                                                                                                                                                                                                                                                                                                                                                                                                         | P6-7, Methods                                                                                                                                                                                                                   |
| <i>Participants</i> | 6           | <p>(a) <b>Cohort study</b> – Give the eligibility criteria, and the sources and methods of selection of participants. Describe methods of follow-up.</p> <p><b>Case-control study</b> – Give the eligibility criteria, and the sources and methods of case ascertainment and control selection. Give the rationale for the choice of cases and controls.</p> <p><b>Cross-sectional study</b> – Give the eligibility criteria, and the sources and methods of selection of participants.</p> <hr/> <p>(b) <b>Cohort study</b> – For matched studies, give matching criteria and number of exposed and unexposed.</p> <p><b>Case-control study</b> – For matched studies, give matching criteria and the number of controls per case.</p> | <p><b><i>Give information on the criteria and methods for selection of subsets of participants from a larger study, when relevant.</i></b></p> <p>P8-9, Methods</p>                                                             |
| <i>Variables</i>    | 7           | (a) Clearly define all outcomes, exposures, predictors, potential confounders, and effect modifiers. Give diagnostic criteria, if applicable.                                                                                                                                                                                                                                                                                                                                                                                                                                                                                                                                                                                           | <p><b><i>(b) Clearly define genetic exposures (genetic variants) using a widely-used nomenclature system. Identify variables likely to be associated with population stratification (confounding by ethnic origin).</i></b></p> |

| Item                            | Item number | STROBE Guideline                                                                                                                                                                          | Extension for Genetic Association Studies (STREGA)                                                                                                                                                                                                                                                                                                                                                                                                                                            |
|---------------------------------|-------------|-------------------------------------------------------------------------------------------------------------------------------------------------------------------------------------------|-----------------------------------------------------------------------------------------------------------------------------------------------------------------------------------------------------------------------------------------------------------------------------------------------------------------------------------------------------------------------------------------------------------------------------------------------------------------------------------------------|
|                                 |             |                                                                                                                                                                                           | P6-9, Methods                                                                                                                                                                                                                                                                                                                                                                                                                                                                                 |
| <i>Data sources measurement</i> | g*          | (a) For each variable of interest, give sources of data and details of methods of assessment (measurement). Describe comparability of assessment methods if there is more than one group. | <p><b>(b) Describe laboratory methods, including source and storage of DNA, genotyping methods and platforms (including the allele calling algorithm used, and its version), error rates and call rates. State the laboratory/centre where genotyping was done. Describe comparability of laboratory methods if there is more than one group. Specify whether genotypes were assigned using all of the data from the study simultaneously or in smaller batches.</b></p> <p>P6-7, Methods</p> |
| <i>Bias</i>                     | 9           | (a) Describe any efforts to address potential sources of bias.                                                                                                                            | <b>(b) For quantitative outcome variables, specify if any investigation of potential bias resulting from</b>                                                                                                                                                                                                                                                                                                                                                                                  |

| Item                          | Item number | STROBE Guideline                                                                                                               | Extension for Genetic Association Studies (STREGA)                                                                                                                                           |
|-------------------------------|-------------|--------------------------------------------------------------------------------------------------------------------------------|----------------------------------------------------------------------------------------------------------------------------------------------------------------------------------------------|
|                               |             |                                                                                                                                | <p><i>pharmacotherapy was undertaken. If relevant, describe the nature and magnitude of the potential bias, and explain what approach was used to deal with this.</i></p> <p>P7, Methods</p> |
| <i>Study size</i>             | 10          | Explain how the study size was arrived at.                                                                                     | P7, Methods                                                                                                                                                                                  |
| <i>Quantitative variables</i> | 11          | Explain how quantitative variables were handled in the analyses. If applicable, describe which groupings were chosen, and why. | <p><i>If applicable, describe how effects of treatment were dealt with.</i></p> <p>N/A</p>                                                                                                   |
| <i>Statistical methods</i>    | 12          | (a) Describe all statistical methods, including those used to control for confounding.                                         | <p><i>State software version used and options (or settings) chosen.</i></p> <p>P7-9, Methods</p>                                                                                             |
|                               |             | (b) Describe any methods used to examine subgroups and interactions.                                                           | N/A                                                                                                                                                                                          |
|                               |             | (c) Explain how missing data were addressed.                                                                                   | N/A                                                                                                                                                                                          |

| Item | Item number | STROBE Guideline                                                                                                                                                                                                                                                                                                               | Extension for Genetic Association Studies (STREGA)                                                            |
|------|-------------|--------------------------------------------------------------------------------------------------------------------------------------------------------------------------------------------------------------------------------------------------------------------------------------------------------------------------------|---------------------------------------------------------------------------------------------------------------|
|      |             | <p>(d) <b>Cohort study</b> – If applicable, explain how loss to follow-up was addressed.</p> <p><b>Case-control study</b> – If applicable, explain how matching of cases and controls was addressed.</p> <p><b>Cross-sectional study</b> – If applicable, describe analytical methods taking account of sampling strategy.</p> | <p>N/A</p>                                                                                                    |
|      |             | <p>(e) Describe any sensitivity analyses.</p>                                                                                                                                                                                                                                                                                  | <p>N/A</p>                                                                                                    |
|      |             |                                                                                                                                                                                                                                                                                                                                | <p><b>(f) State whether Hardy-Weinberg equilibrium was considered and, if so, how.</b></p> <p>P7, Methods</p> |
|      |             |                                                                                                                                                                                                                                                                                                                                | <p><b>(g) Describe any methods used for inferring genotypes or haplotypes.</b></p> <p>N/A</p>                 |
|      |             |                                                                                                                                                                                                                                                                                                                                | <p><b>(h) Describe any methods used to assess or address population stratification.</b></p>                   |

| Item           | Item number | STROBE Guideline | Extension for Genetic Association Studies (STREGA)                                                                                                     |
|----------------|-------------|------------------|--------------------------------------------------------------------------------------------------------------------------------------------------------|
|                |             |                  | N/A                                                                                                                                                    |
|                |             |                  | <p><b><i>(i) Describe any methods used to address multiple comparisons or to control risk of false positive findings.</i></b></p> <p>P8-9, Methods</p> |
|                |             |                  | <p><b><i>(j) Describe any methods used to address and correct for relatedness among subjects</i></b></p> <p>P7, Methods</p>                            |
| <b>Results</b> |             |                  |                                                                                                                                                        |

| Item                    | Item number | STROBE Guideline                                                                                                                                                                                                | Extension for Genetic Association Studies (STREGA)                                                                                                                            |
|-------------------------|-------------|-----------------------------------------------------------------------------------------------------------------------------------------------------------------------------------------------------------------|-------------------------------------------------------------------------------------------------------------------------------------------------------------------------------|
| <i>Participants</i>     | 13*         | (a) Report the numbers of individuals at each stage of the study – e.g., numbers potentially eligible, examined for eligibility, confirmed eligible, included in the study, completing follow-up, and analysed. | <p><b>Report numbers of individuals in whom genotyping was attempted and numbers of individuals in whom genotyping was successful.</b></p> <p>P7, Methods, Suppl Table S1</p> |
|                         |             | (b) Give reasons for non-participation at each stage.                                                                                                                                                           |                                                                                                                                                                               |
|                         |             | (c) Consider use of a flow diagram.                                                                                                                                                                             | Figure 1                                                                                                                                                                      |
| <i>Descriptive data</i> | 14*         | (a) Give characteristics of study participants (e.g., demographic, clinical, social) and information on exposures and potential confounders.                                                                    | <p><b>Consider giving information by genotype.</b></p> <p>Suppl Table S1</p>                                                                                                  |
|                         |             | (b) Indicate the number of participants with missing data for each variable of interest.                                                                                                                        | N/A                                                                                                                                                                           |
|                         |             | (c) <b>Cohort study</b> – Summarize follow-up time, e.g. average and total amount.                                                                                                                              |                                                                                                                                                                               |

| Item                | Item number | STROBE Guideline                                                                                                                                                                                                 | Extension for Genetic Association Studies (STREGA)                                                                                                |
|---------------------|-------------|------------------------------------------------------------------------------------------------------------------------------------------------------------------------------------------------------------------|---------------------------------------------------------------------------------------------------------------------------------------------------|
| <i>Outcome data</i> | 15 *        | <b>Cohort study</b> -Report numbers of outcome events or summary measures over time.                                                                                                                             | <b>Report outcomes (phenotypes) for each genotype category over time</b>                                                                          |
|                     |             | <b>Case-control study</b> – Report numbers in each exposure category, or summary measures of exposure.                                                                                                           | <b>Report numbers in each genotype category</b>                                                                                                   |
|                     |             | <b>Cross-sectional study</b> – Report numbers of outcome events or summary measures.                                                                                                                             | <b>Report outcomes (phenotypes) for each genotype category</b><br><br>CTG-VIEW<br>( <a href="https://view.genoma.io">https://view.genoma.io</a> ) |
| <i>Main results</i> | 16          | (a) Give unadjusted estimates and, if applicable, confounder-adjusted estimates and their precision (e.g., 95% confidence intervals). Make clear which confounders were adjusted for and why they were included. | P9-12, Results, Supplementary Tables S2-S19                                                                                                       |
|                     |             | (b) Report category boundaries when continuous variables were categorized.                                                                                                                                       | N/A                                                                                                                                               |
|                     |             | (c) If relevant, consider translating estimates of relative risk into absolute risk for a meaningful time period.                                                                                                | N/A                                                                                                                                               |



| Item                  | Item number | STROBE Guideline                                                                                                | Extension for Genetic Association Studies (STREGA)                                                                                                                                     |
|-----------------------|-------------|-----------------------------------------------------------------------------------------------------------------|----------------------------------------------------------------------------------------------------------------------------------------------------------------------------------------|
|                       |             |                                                                                                                 | <p><b><i>(d) Report results of any adjustments for multiple comparisons.</i></b></p> <p>P9-12, Results, Supplementary Tables S2-S19</p>                                                |
| <i>Other analyses</i> | 17          | <b>(a)</b> Report other analyses done – e.g., analyses of subgroups and interactions, and sensitivity analyses. |                                                                                                                                                                                        |
|                       |             |                                                                                                                 | <p><b><i>(b) If numerous genetic exposures (genetic variants) were examined, summarize results from all analyses undertaken.</i></b></p>                                               |
|                       |             |                                                                                                                 | <p><b><i>(c) If detailed results are available elsewhere, state how they can be accessed.</i></b></p> <p>CTG-VIEW<br/> <a href="https://view.genoma.io">https://view.genoma.io</a></p> |
| <b>Discussion</b>     |             |                                                                                                                 |                                                                                                                                                                                        |

| <b>Item</b>              | <b>Item number</b> | <b>STROBE Guideline</b>                                                                                                                                                     | <b>Extension for Genetic Association Studies (STREGA)</b> |
|--------------------------|--------------------|-----------------------------------------------------------------------------------------------------------------------------------------------------------------------------|-----------------------------------------------------------|
| <i>Key results</i>       | 18                 | Summarize key results with reference to study objectives.                                                                                                                   | P12-13, Discussion                                        |
| <i>Limitations</i>       | 19                 | Discuss limitations of the study, taking into account sources of potential bias or imprecision. Discuss both direction and magnitude of any potential bias.                 | P17, Discussion                                           |
| <i>Interpretation</i>    | 20                 | Give a cautious overall interpretation of results considering objectives, limitations, multiplicity of analyses, results from similar studies, and other relevant evidence. | P12-18, Discussion                                        |
| <i>Generalizability</i>  | 21                 | Discuss the generalizability (external validity) of the study results.                                                                                                      | P17-18, Discussion                                        |
| <b>Other Information</b> |                    |                                                                                                                                                                             |                                                           |
| <i>Funding</i>           | 22                 | Give the source of funding and the role of the funders for the present study and, if applicable, for the original study on which the present article is based.              | P3                                                        |

STREGA = STrengthening the REporting of Genetic Association studies; STROBE = STrengthening the Reporting of Observational Studies in Epidemiology.

\* Give information separately for cases and controls in case-control studies and, if applicable, for exposed and unexposed groups in cohort and cross-sectional studies.
